# Supplementary material for: Gold Nanobeads with Enhanced Absorbance for Improved Sensitivity in Competitive Lateral Flow Immunoassays
Source: MDPI journal article supplement (doi:10.3390/foods10071488), 2021-06-27
Supplement: s1 [file s1]

## **Gold Nanobeads with Enhanced Absorbance for Improved Sensitivity in Competitive Lateral Flow Immunoassays**

Xirui Chen<sup>a,b</sup>, Xintao Miao<sup>a,b</sup>, Tongtong Ma<sup>a,b</sup>, Yuankui Leng<sup>a,b</sup>, Liangwen Hao<sup>a,b</sup>, Hong Duan<sup>a,b</sup>, Jing Yuan<sup>a,b</sup>, Yu Li<sup>a,b</sup>, Xiaolin Huang<sup>\*a,b</sup> and Yonghua Xiong<sup>a,b,c</sup>

<sup>a</sup> State Key Laboratory of Food Science and Technology, Nanchang University, Nanchang 330047, P. R. China;

<sup>b</sup> School of Food Science and Technology, Nanchang University, Nanchang 330047, P. R. China;

<sup>c</sup> Jiangxi-OAI Joint Research Institute, Nanchang University, Nanchang 330047, P. R. China;

\*Correspondence to:

Dr. Xiaolin Huang

State Key Laboratory of Food Science and Technology, and Jiangxi-OAI Joint Research Institute, Nanchang University, Nanchang 330047, P.R. China

E-mail: hxl19880503@163.com

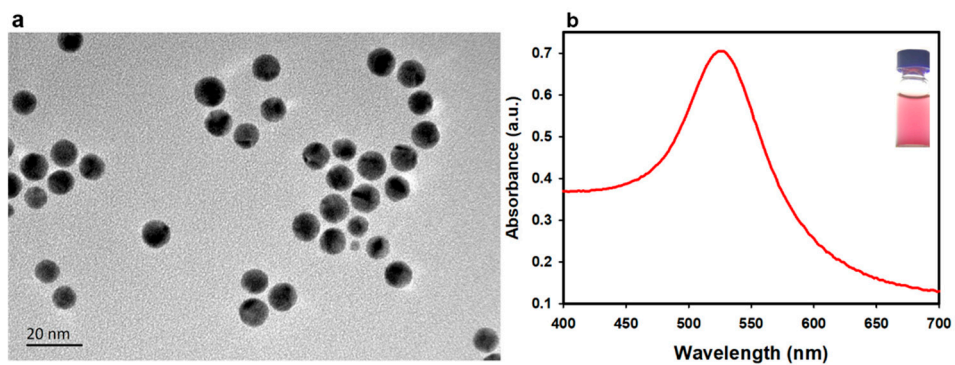

**Figure S1.** Characterization of oleylamine-coated AuNPs. (a) TEM image. (b) UV-vis absorption spectrum.

**Table S1.** Synthesis conditions of different GNBs.

| Size (nm) | Oleylamine-coated AuNPs (mg) | PMAO (mg) | SDS (mg) | Oil/water ( $\mu\text{L}/\mu\text{L}$ ) | Ultrasonic power (960 W) |
|-----------|------------------------------|-----------|----------|-----------------------------------------|--------------------------|
| 94 nm     | 10                           | 2         | 6        | 50/500                                  | 8% (76.8 w)              |
| 129 nm    | 10                           | 2         | 4        | 50/500                                  | 8% (76.8 w)              |
| 237 nm    | 10                           | 2         | 2.5      | 20/500                                  | 8% (76.8 w)              |

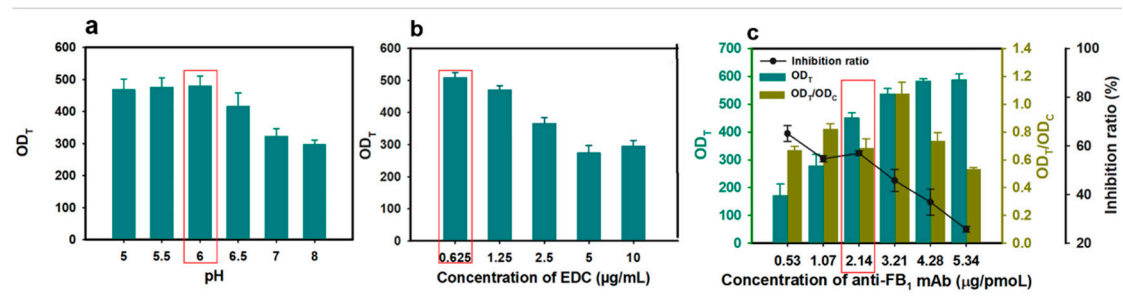

**Figure S2.** Parameter optimization of GNB<sub>94</sub>-LFIA for FB<sub>1</sub> detection. (a) Effect of pH for the conjugation of anti-FB<sub>1</sub> mAb to GNBs. (b) The EDC concentration for the anti-FB<sub>1</sub> mAb conjugation. (c) The optimal labeling amount of anti-FB<sub>1</sub> mAb on the GNB<sub>94</sub> surface.

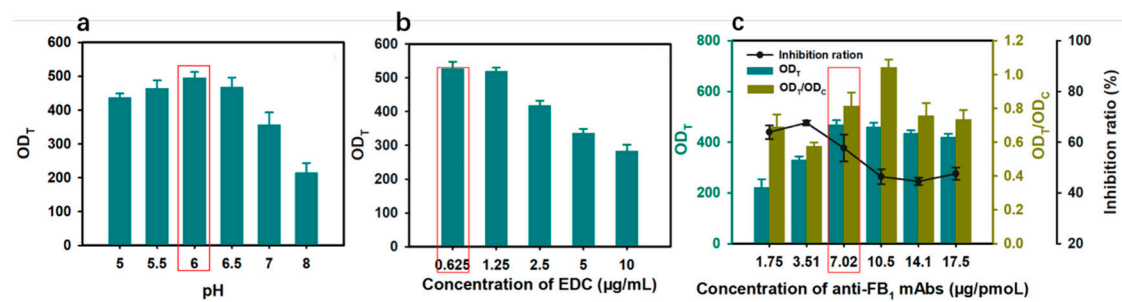

**Figure S3** Parameter optimization of GNB<sub>129</sub>-LFIA for FB<sub>1</sub> detection. (a) Effect of pH for the conjugation of anti-FB<sub>1</sub> mAb to GNBs. (b) The EDC concentration for the anti-FB<sub>1</sub> mAb conjugation. (c) The optimal labeling amount of anti-FB<sub>1</sub> mAb on the GNB<sub>129</sub> surface.

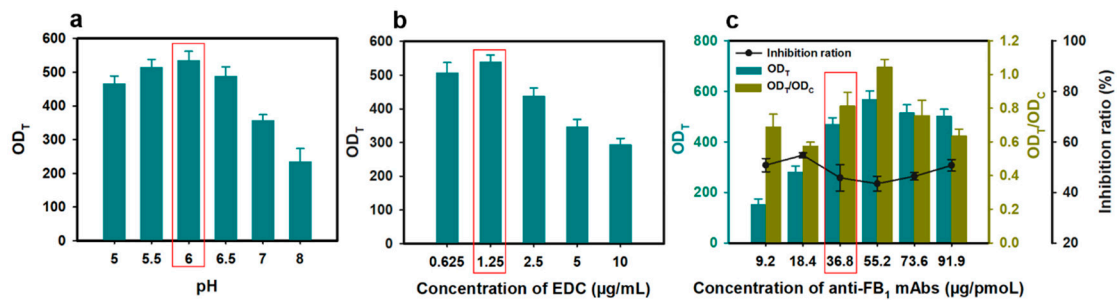

**Figure S4** Parameter optimization of GNB<sub>237</sub>-LFIA for FB<sub>1</sub> detection. (a) Effect of pH for the conjugation of anti-FB<sub>1</sub> mAb to GNBs. (b) The EDC concentration for the anti-FB<sub>1</sub> mAb conjugation. (c) The optimal labeling amount of anti-FB<sub>1</sub> mAb on the GNB<sub>237</sub> surface.

**Table S2.** Optimization of the parameters of the GNB<sub>94</sub>-LFIA

| No. | Concentration of<br>FB <sub>1</sub> -BSA<br>(mg/mL) | Amount of<br>GNB <sub>94</sub> -probe<br>(fmol) | Optical density of<br>T-line (a.u) | Value of T/C | Inhibition rate<br>(%) |
|-----|-----------------------------------------------------|-------------------------------------------------|------------------------------------|--------------|------------------------|
| 1   | 1.33                                                | 1.32                                            | 843 ± 30                           | 1.8 ± 0.3    | 19.4 ± 4.3             |
| 2   | 0.66                                                | 1.32                                            | 679 ± 23                           | 1.5 ± 0.2    | 24.5 ± 3.3             |
| 3   | 0.33                                                | 1.32                                            | 554 ± 19                           | 1.1 ± 0.2    | 36.8 ± 4.2             |
| 4   | 1.33                                                | 0.66                                            | 495 ± 24                           | 1.6 ± 0.2    | 56.3 ± 5.3             |
| 5   | 0.66                                                | 0.66                                            | 356 ± 28                           | 1.1 ± 0.3    | 49.3 ± 5.3             |
| 6   | 0.33                                                | 0.66                                            | 303 ± 10                           | 0.9 ± 0.1    | 59.3 ± 5.8             |
| 7   | 1.33                                                | 0.33                                            | 298 ± 12                           | 1.3 ± 0.1    | 56.4 ± 6.5             |
| 8   | 0.66                                                | 0.33                                            | 240 ± 14                           | 1.0 ± 0.1    | 65.3 ± 10.3            |
| 9   | 0.33                                                | 0.33                                            | 197 ± 12                           | 1.0 ± 0.1    | 46.3 ± 7.5             |

**Note:** The red mark indicates the optimal combination of conditions.

**Table S3.** Optimization of the parameters of the GNB<sub>129</sub>-LFIA

| No. | Concentration of FB-BSA (mg/mL) | Amount of GNB <sub>129</sub> -probe (fmol) | Optical density of T-line (a.u) | Value of T/C | Inhibition rate (%) |
|-----|---------------------------------|--------------------------------------------|---------------------------------|--------------|---------------------|
| 1   | 0.33                            | 0.17                                       | 369 ± 33                        | 2.4 ± 0.2    | 79.8 ± 2.2          |
| 2   | 0.66                            | 0.17                                       | 254 ± 11                        | 1.7 ± 0.0    | 58.6 ± 7.9          |
| 3   | 1.33                            | 0.17                                       | 210 ± 4                         | 1.3 ± 0.2    | 56.5 ± 11.2         |
| 4   | 0.33                            | 0.34                                       | 384 ± 42                        | 2.1 ± 0.3    | 72.4 ± 3.1          |
| 5   | 0.66                            | 0.34                                       | 444 ± 72                        | 1.8 ± 0.2    | 68.3 ± 3.4          |
| 6   | 1.33                            | 0.34                                       | 535 ± 21                        | 1.1 ± 0.4    | 67.4 ± 6.3          |
| 7   | 0.33                            | 0.68                                       | 522 ± 27                        | 1.8 ± 0.1    | 54.5 ± 1.2          |
| 8   | 0.66                            | 0.68                                       | 658 ± 28                        | 1.4 ± 0.0    | 55.1 ± 0.5          |
| 9   | 1.33                            | 0.68                                       | 801 ± 23                        | 0.8 ± 0.0    | 59.3 ± 8.1          |

**Note:** The red mark indicates the optimal combination of conditions.



**Table S4.** Optimization of the parameters of the GNB<sub>237</sub>-LFIA

| No. | Concentration of<br>FB1-BSA<br>(mg/mL) | Amount of<br>GNB <sub>237</sub> -probe<br>(fmol) | Optical density of<br>T-line (a.u) | Value of T/C | Inhibition rate<br>(%) |
|-----|----------------------------------------|--------------------------------------------------|------------------------------------|--------------|------------------------|
| 1   | 1.33                                   | 0.36                                             | 743 ± 50                           | 1.5 ± 0.1    | 25.7 ± 2.3             |
| 2   | 0.66                                   | 0.36                                             | 579 ± 54                           | 1.6 ± 0.1    | 32.2 ± 2.3             |
| 3   | 0.33                                   | 0.36                                             | 553 ± 13                           | 1.3 ± 0.0    | 44.8 ± 3.3             |
| 4   | 1.33                                   | 0.18                                             | 518 ± 26                           | 1.5 ± 0.1    | 62.6 ± 6.2             |
| 5   | 0.66                                   | 0.18                                             | 484 ± 37                           | 1.5 ± 0.1    | 56.6 ± 5.2             |
| 6   | 0.33                                   | 0.18                                             | 422 ± 3                            | 1.3 ± 0.1    | 65.7 ± 4.3             |
| 7   | 1.33                                   | 0.09                                             | 341 ± 11                           | 1.9 ± 0.0    | 45.6 ± 5.3             |
| 8   | 0.66                                   | 0.09                                             | 333 ± 19                           | 1.6 ± 0.1    | 37.6 ± 3.2             |
| 9   | 0.33                                   | 0.09                                             | 308 ± 12                           | 1.3 ± 0.1    | 42.8 ± 5.3             |

**Note:** The red mark indicates the optimal combination of conditions.

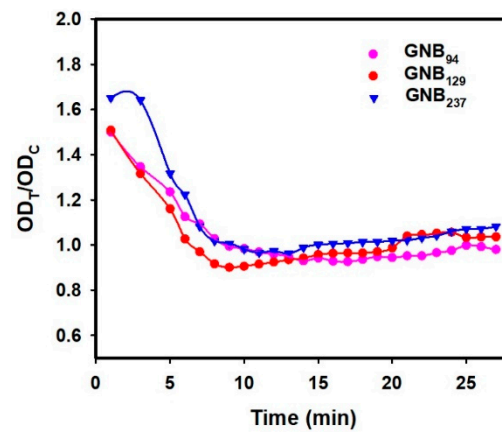

**Figure S5** Immunoreaction dynamics of OD<sub>T</sub>/OD<sub>C</sub> at a FB<sub>1</sub> negative sample.

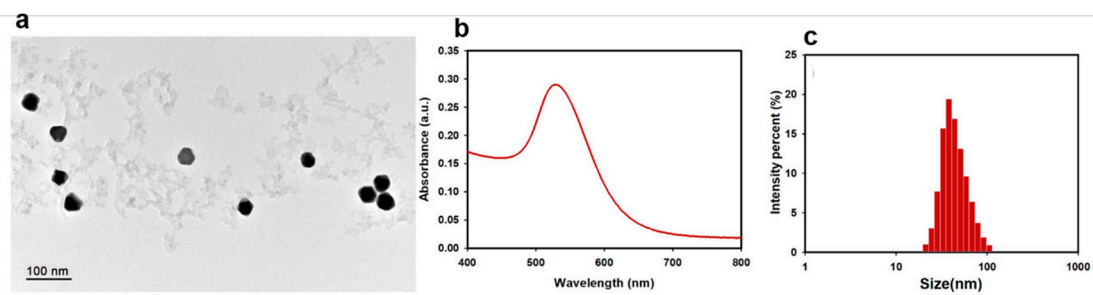

**FigureS6** Characterization of traditional 40 nm AuNPs. (a) TEM images. (b) UV-Vis spectrum . (c) DLS analysis.

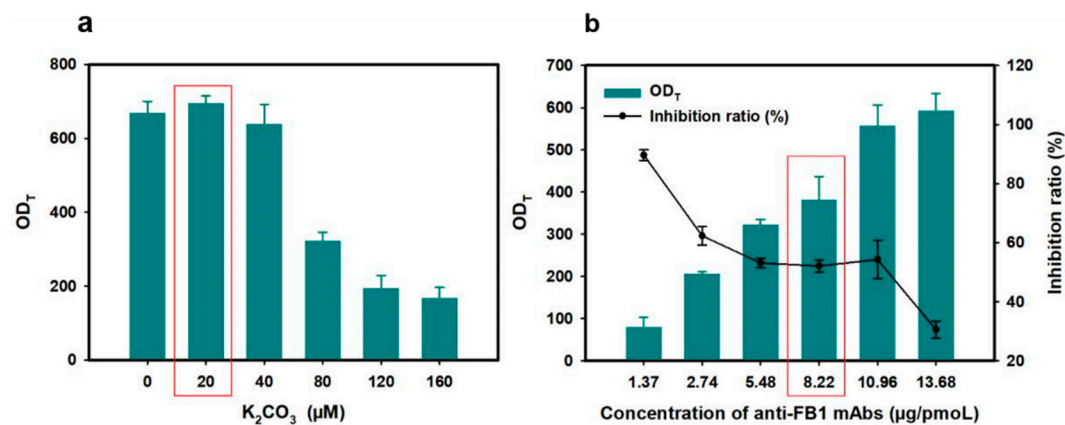

**Figure S6.** Parameter optimization of traditional AuNP<sub>40</sub>-LFIA. (a) The K<sub>2</sub>CO<sub>3</sub> concentration for the anti-FB<sub>1</sub> mAb conjugation. (b) The optimal labeling amount of anti-FB<sub>1</sub> mAb on the AuNP<sub>40</sub> surface.

**Table S4.** Optimization of the parameters of the AuNP<sub>40</sub>-LFIA

| No. | Concentration of<br>FB <sub>1</sub> -BSA (mg/mL) | Amount of<br>AuNP <sub>40</sub> -probe<br>(fmol) | Optical density of<br>T-line (a.u) | Value of<br>OD <sub>T</sub> /OD <sub>C</sub> | Inhibition rate<br>(%) |
|-----|--------------------------------------------------|--------------------------------------------------|------------------------------------|----------------------------------------------|------------------------|
| 1   | 2.50                                             | 1.18                                             | 443 ± 23                           | 2.6 ± 0.9                                    | 0.7 ± 0.0              |
| 2   | 2                                                | 1.18                                             | 353 ± 11                           | 3.9 ± 1.0                                    | 0.7 ± 0.0              |
| 3   | 1.5                                              | 1.18                                             | 263 ± 8                            | 3.8 ± 0.3                                    | 0.8 ± 0.0              |
| 4   | 2.50                                             | 2.36                                             | 754 ± 42                           | 2.0 ± 0.3                                    | 0.5 ± 0.0              |
| 5   | 2                                                | 2.36                                             | 622 ± 72                           | 1.9 ± 0.2                                    | 0.7 ± 0.0              |
| 6   | 1.5                                              | 2.36                                             | 541 ± 21                           | 2.0 ± 0.34                                   | 0.7 ± 0.1              |
| 7   | 2.50                                             | 4.72                                             | 1091 ± 27                          | 1.5 ± 0.0                                    | 0.6 ± 0.0              |
| 8   | 2                                                | 4.72                                             | 1006 ± 56                          | 1.6 ± 0.0                                    | 0.6 ± 0.0              |
| 9   | 1.5                                              | 4.72                                             | 903 ± 92                           | 1.6 ± 0.1                                    | 0.6 ± 0.0              |

**Note:** The red mark indicates the optimal combination of conditions.

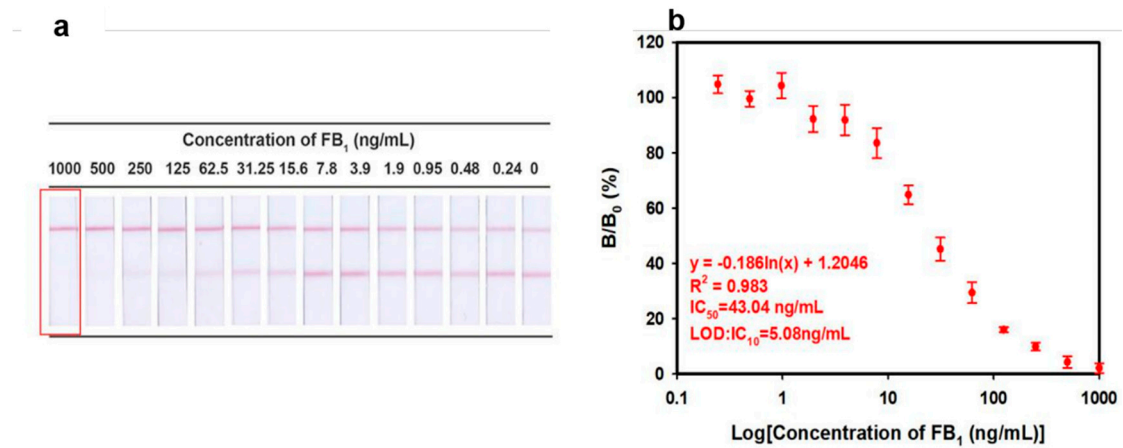

**Figure S7.** Qualitative and quantitative assay for FB<sub>1</sub> in PBS buffer using traditional AuNP<sub>40</sub>-LFIA. (a) The prototypes of AuNP<sub>40</sub>-LFIA strips responding to varying FB<sub>1</sub> concentrations. (b) Linear dependences against FB<sub>1</sub> concentrations of four AuNP<sub>40</sub>-LFIA strips.

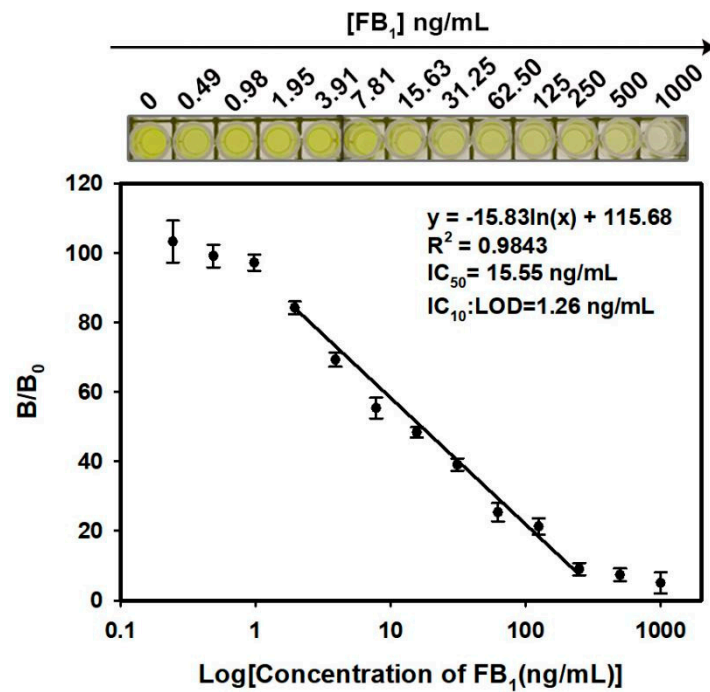

**Figure S8.** Quantitative assay of the conventional HRP-based ELISA for FB<sub>1</sub> detection.

**Table S5.** A comparison of our proposed GNB<sub>129</sub>-LFIA with other reported LFIA methods for the determination of FB<sub>1</sub>.

| Label                                                  | Signal output | Linear range  | Detection limit              | Ref       |
|--------------------------------------------------------|---------------|---------------|------------------------------|-----------|
| Gold or silver nanoparticles and CdSe/ZnS quantum dots | Fluorescence  | NA            | 1.56-6.25 ng/mL <sup>a</sup> | [1]       |
| AuNPs                                                  | Colorimetry   | NA            | 5 ng/mL <sup>a</sup>         | [2]       |
| AuNPs                                                  | Colorimetry   | 2-40 ng/mL    | 2 ng/mL <sup>a</sup>         | [3]       |
| AuNPs                                                  | Colorimetry   | NA            | 3200 µg/kg <sup>a</sup>      | [4]       |
| AuNPs                                                  | Colorimetry   | NA            | 50 ng/mL <sup>b</sup>        | [5]       |
| AuNPs                                                  | Colorimetry   | NA            | 1000 µg/kg <sup>b</sup>      | [6]       |
| AuNPs                                                  | Colorimetry   | 4-80 ng/mL    | 3.72 ng/mL <sup>a</sup>      | [7]       |
| Urchin-like AuNPs                                      | Colorimetry   | NA            | 5 ng/mL <sup>b</sup>         | [8]       |
| GNBs                                                   | Colorimetry   | 3.9-125 ng/mL | 1.79 ng/mL <sup>a</sup>      | This work |

**Note:** ‘NA’ indicates the “Not available”. ‘a’ indicates “IC<sub>10</sub>”, and ‘b’ indicates “cutoff limit”.

#### Reference:

1. Anfossi, L. ; Di Nardo, F. ; Cavallera, S. ; Giovannoli, C. ; Spano, G. ; Speranskaya, E.S. ; Goryacheva, I.Y., and Baggiani, C. "A Lateral Flow Immunoassay for Straightforward Determination of Fumonisin Mycotoxins Based on the Quenching of the Fluorescence of CdSe/Zns Quantum Dots by Gold and Silver Nanoparticles." *Microchimica Acta* 185 (2018): 94.
2. Venkataramana, M. ; Navya, K. ; Chandranayaka, S. ; Priyanka, S.R. ; Murali, H.S., and Batra, H.V. "Development and Validation of an Immunochromatographic Assay for Rapid Detection of Fumonisin B1 from Cereal Samples." *J Food Sci Technol* 51, (2014): 1920-1928.
3. Wang, X.C. ; Fan, H.X. ; Fan, M.X. ; Li, F.H. ; Feng, S.B. ; Li, J.C. ; Wu, J.J. ; Li, Y., and Wang, J.S. "A Sensitive Immunochromatographic Assay Using Colloidal Gold-Antibody Probe for Rapid Detection of Fumonisin B1 in Corn." *Food Addit Contam Part A Chem Anal Control Expo Risk Assess* 33 (2016): 1435-1443.
4. Lattanzio, V.M. ; Nivarlet, N. ; Lippolis, V. ; Della Gatta, S. ; Huet, A.C. ; Delahaut, P. ; Granier, B., and Visconti, A. "Multiplex Dipstick Immunoassay for Semi-Quantitative Determination of Fusarium Mycotoxins in Cereals." *Anal Chim Acta* 718 (2012): 99-108.
5. Wang, Y.-K. ; Shi, Y.-B. ; Zou, Q. ; Sun, J.-H. ; Chen, Z.-F. ; Wang, H.-a. ; Li, S.-Q., and Yan, Y.-X. "Development of a Rapid and Simultaneous Immunochromatographic Assay for the Determination of Zearalenone and Fumonisin B1 in Corn, Wheat and Feedstuff Samples." *Food Control* 31 (2013): 180-188.
6. Di Nardo F. ; Baggiani C. ; Giovannoli C. ; Spano G., and Anfossi L. "Multicolor Immunochromatographic Strip Test Based on Gold Nanoparticles for the Determination of Aflatoxin B1 and Fumonisin." *Microchimica Acta* 5 (2017) 1295-1304.
7. Wu Y. ; Zhou Y. ; Huang H. ; Chen X. ; Leng Y. ; Lai W. ; Huang X., and Xiong Y. "Engineered Gold Nanoparticles as Multicolor Labels for Simultaneous Multi-Mycotoxin Detection on the Immunochromatographic Test Strip Nanosensor." *Sensors and Actuators B: Chemical* 316 (2020): 128107.
8. Ren, W. ; Huang, Z. ; Xu, Y. ; Li, Y. ; Ji, Y., and Su, B. "Urchin-Like Gold Nanoparticle-Based Immunochromatographic Strip Test for Rapid Detection of Fumonisin B1 in Grains." *Anal Bioanal Chem* 407 (2015): 7341-7348.
